# Supplementary material for: Investigations on the mode of action of gephyronic acid, an inhibitor of eukaryotic protein translation from myxobacteria
Source: PLOS journal article supplement (doi:10.1371/journal.pone.0201605), 2018-07-31
Supplement: S2 (10.1371/journal.pone.0201605.s002) [file journal.pone.0201605.s002.pdf]

## S2 File. NMR analyses of biotin esters

(C-11)-biotin ester (**4a**) = Methyl (3*S*,4*R*,5*S*,8*S*,10*S*,11*S*)-11-hydroxy-5-methoxy-4,6,6,8,10-pentamethyl-11- $\{$ (2*R*,3*R*)-2-methyl-3- $\{$ (*S*)-4-methylpent-3-en-2-yl $\}$ oxiran-2-yl $\}$ -7-oxo-11- $\{$ 5- $\{$ (3*aS*,6*aR*)-2-oxohexahydro-1*H*-thieno[3,4-*d*]imidazol-4-yl $\}$ pentanoyloxy $\}$ un-decanoate

$R_f$  = 0.35 (ethyl acetate/MeOH 10 : 1).  $^1\text{H-NMR}$  (800 MHz,  $\text{CDCl}_3$ )  $\delta$  = 0.90 (d,  $J$  = 6.3 Hz, 3H, 23-H), 0.92 (d,  $J$  = 7.0 Hz, 3H, 18-H), 1.00 (d,  $J$  = 6.3 Hz, 3H, 22-H), 1.06-1.16 (m, 1H, 9- $\text{H}_b$ ), 1.095 (d,  $J$  = 6.0 Hz, 3H, 25-H), 1.101 (s, 3H, 21-H), 1.21 (s, 3H, 20-H), 1.28-1.37 (m, 1H, 9- $\text{H}_a$ ), 1.39 (s, 3H, 24-H), 1.47-1.50 (m, 1H, 4'- $\text{H}_b$ ), 1.50-1.57 (m, 1H, 4'- $\text{H}_a$ ), 1.60-1.69 (m, 3H, 4-H, 5'- $\text{H}_b$ , 3'- $\text{H}_b$ ), 1.69 (s, 3H, 26-H), 1.71 (s, 3H, 17-H), 1.73-1.80 (m, 3H, 10-H, 5'- $\text{H}_a$ , 3'- $\text{H}_a$ ), 2.35-2.40 (m, 1H, 2'- $\text{H}_b$ ), 2.44-2.47 (m, 1H, 2'- $\text{H}_a$ ), 2.47-2.50 (m, 1H, 2- $\text{H}_b$ ), 2.52-2.60 (m, 2H, 2- $\text{H}_a$ , 14-H), 2.71-2.75 (m, 2H, 9'- $\text{H}_b$ , 13-H), 2.92-2.97 (m, 1H, 9'- $\text{H}_a$ ), 3.05-3.10 (m, 1H, 8-H), 3.16-3.21 (m, 1H, 6'-H), 3.36 (2, 3H, 19-H), 3.52-3.54 (m, 1H, 5-H), 3.73 (s, 3H, COOMe), 3.94-3.99 (m, 1H, 3-H), 4.25-4.29 (m, 1H, 11-H), 4.35-4.40 (m, 1H, 7'-H), 4.51-4.55 (m, 1H, 8'-H), 4.72 (brs, 1H, NH), 4.94-4.99 (m, 1H, 15-H), 5.66 (brs, 1H, NH) ppm.  $^{13}\text{C-NMR}$  (200 MHz,  $\text{CDCl}_3$ )  $\delta$  = 8.8 (C-18), 12.2 (C-24), 15.1 (C-23), 15.9 (C-22), 18.3 (C-26), 19.1 (C-21), 20.5 (C-20), 21.2 (C-25), 25.1 (C-3'), 25.8 (C-17), 28.2 (C-5'), 28.4 (C-4'), 32.2 (C-14), 32.4 (C-10), 34.3 (C-2'), 36.6 (C-9), 37.7 (C-8), 39.3 (C-2), 39.7 (C-4), 40.6 (C-9'), 51.9 (COOMe), 52.0 (C-6), 55.6 (C-6'), 60.1 (C-8'), 60.3 (C-19), 61.6 (C-7'), 62.7 (C-12), 68.6 (C-13), 70.8 (C-3), 82.7 (C-11), 86.3 (C-5), 124.8 (C-15), 132.5 (C-16), 163.0 (C-10'), 172.9 (C-1'), 173.4 (C-1) ppm. MS (ESI)  $m/z$  = 733  $[\text{M}+\text{Na}]^+$ , 693, 449. HRMS (ESI)  $m/z$ : calcd. for  $\text{C}_{37}\text{H}_{62}\text{N}_2\text{O}_9\text{SNa}^+$  = 733.4068, found: 733.4076  $[\text{M}+\text{Na}]^+$ . FT-IR (ATR)  $\tilde{\nu}$  = 3283 (m), 2924 (vs), 2854 (s), 2671 (w), 2483 (w), 2359 (w), 1735 (s), 1697 (s), 1558 (w), 1460 (s), 1378 (m), 1256 (m), 1164 (m), 1099 (m), 989 (m)  $\text{cm}^{-1}$ .  $[\alpha]_D^{20}$  = + 2.6 ( $c$  = 1.00,  $\text{CH}_2\text{Cl}_2$ )

(C-3)-biotin ester (**4b**) = Methyl (3*S*,4*R*,5*S*,8*S*,10*S*,11*S*)-11-hydroxy-5-methoxy-4,6,6,8,10-pentamethyl-11- $\{$ (2*R*,3*R*)-2-methyl-3- $\{$ (*S*)-4-methylpent-3-en-2-yl $\}$ oxiran-2-yl $\}$ -7-oxo-3- $\{$ 5- $\{$ (3*aS*,6*aR*)-2-oxohexahydro-1*H*-thieno[3,4-*d*]imidazol-4-yl $\}$ pentanoyloxy $\}$ un-decanoate

$R_f$  = 0.30 (ethyl acetate/MeOH 10 : 1).  $^1\text{H-NMR}$  (800 MHz,  $\text{CDCl}_3$ )  $\delta$  = 0.81 (d,  $J$  = 6.7 Hz, 3H, 23-H), 0.96 (d,  $J$  = 7.0 Hz, 3H, 18-H), 1.02 (d,  $J$  = 6.5 Hz, 3H, 22-H), 1.10 (s, 3H, 21-H), 1.11 (d,  $J$  = 6.7 Hz, 3H, 25-H), 1.19-1.24 (m, 1H, 9- $\text{H}_b$ ), 1.23 (s, 3H, 20-H), 1.27 (s, 3H, 24-H), 1.43-1.56 (m, 3H, 4'- $\text{H}_b$ , 4'- $\text{H}_a$ , 10-H), 1.61-1.71 (m, 2H, 5'- $\text{H}_b$ , 3'- $\text{H}_b$ ), 1.64 (s, 3H, 26-H), 1.70 (s, 3H, 17-H), 1.72-1.80 (m, 2H, 5'- $\text{H}_a$ , 3'- $\text{H}_a$ ), 1.95-2.00 (m, 1H, 4-H), 2.31-2.35 (m, 1H, 14-H), 2.35-2.38 (m, 1H, 2'- $\text{H}_b$ ), 2.43-2.48 (m, 1H, 2'- $\text{H}_a$ ), 2.60-2.66 (m, 3H, 13-H, 2- $\text{H}_b$ , 2- $\text{H}_a$ ), 2.71-2.78 (m, 2H, 11-H, 9'- $\text{H}_b$ ), 2.92-2.97 (m, 1H, 9'- $\text{H}_a$ ), 3.13-3.22 (m, 2H, 8-H, 6'-H), 3.31 (2, 3H, 19-H), 3.46-3.48 (m, 1H, 5-H), 3.70 (s, 3H, COOMe), 4.34-4.38 (m, 1H, 7'-H), 4.52-4.56 (m, 1H, 8'-H), 4.95-4.99 (m, 1H, 15-H), 5.17-5.21 (m, 1H, 3-H), 5.27 (brs, 1H, NH), 5.57 (brs, 1H, NH) ppm.  $^{13}\text{C-NMR}$  (200 MHz,  $\text{CDCl}_3$ )  $\delta$  = 9.9 (C-18), 11.4 (C-24), 15.7 (C-23), 16.4 (C-22), 18.4 (C-26), 21.7 (C-21), 19.0 (C-25), 19.8 (C-20), 24.8 (C-3'), 25.9 (C-17), 28.19 (C-5'), 28.21 (C-4'), 32.5 (C-14), 33.4 (C-10), 34.1 (C-2'), 36.9 (C-2), 37.5 (C-9), 37.6 (C-4), 38.3 (C-8), 40.6 (C-9'), 51.9 (COOMe), 54.0 (C-6), 55.2 (C-6'), 60.2 (C-8'), 60.4 (C-19), 61.9 (C-7'), 64.4 (C-12), 68.4 (C-13), 73.6 (C-3), 82.7 (C-11), 84.9 (C-5), 125.0 (C-15), 132.1 (C-16), 163.5 (C-10'), 171.0 (C-1), 172.9 (C-1') ppm. MS (ESI)  $m/z$  = 733  $[\text{M}+\text{Na}]^+$ , 711, 693, 599. HRMS (ESI)  $m/z$ : calcd. for  $\text{C}_{37}\text{H}_{62}\text{N}_2\text{O}_9\text{SNa}^+$  = 733.4068, found: 733.4067  $[\text{M}+\text{Na}]^+$ . FT-IR (ATR)  $\tilde{\nu}$  = 3260 (m), 2924 (vs), 2854 (s), 2558 (w), 2365 (w), 2183 (w), 1967 (w), 1736 (s), 1698 (s), 1456 (s), 1377 (m), 1260 (s), 1160 (m), 1099 (s), 989 (m), 801 (m)  $\text{cm}^{-1}$ .  $[\alpha]_D^{20}$  = + 2.0 ( $c$  = 1.00,  $\text{CH}_2\text{Cl}_2$ )

# 1D spectrum of the C-11 compound

```

NAME      C11-Prod_110123
EXPNO    1
PROCNO   1
Date_    20110123
Time     2.19
INSTRUM  spect
PROBHD   5 mm CPTXI-H-
PULPROG  zgpg30
AQ       0.128441 Hz
RG       3.892883 sec
SOLVENT  CDCl3
NS       16
DS       2
SWH      8417.509 Hz
FIDRES   0.128441 Hz
AQ       3.892883 sec
RG       45.2
DE       59.400 usec
TE       10.00 usec
DT       298.0 K
TD0      1
===== CHANNEL f1 =====
NUC1     1H
P1       7.75 usec
PL1      0.00 dB
PT1W     6.51349.63 W
SF01     599.8835983 MHz
SI       32768
SF       599.8800000 MHz
WDW      EM
SSB      0
LB       0.30 Hz
GB       0
PC       1.00
  
```

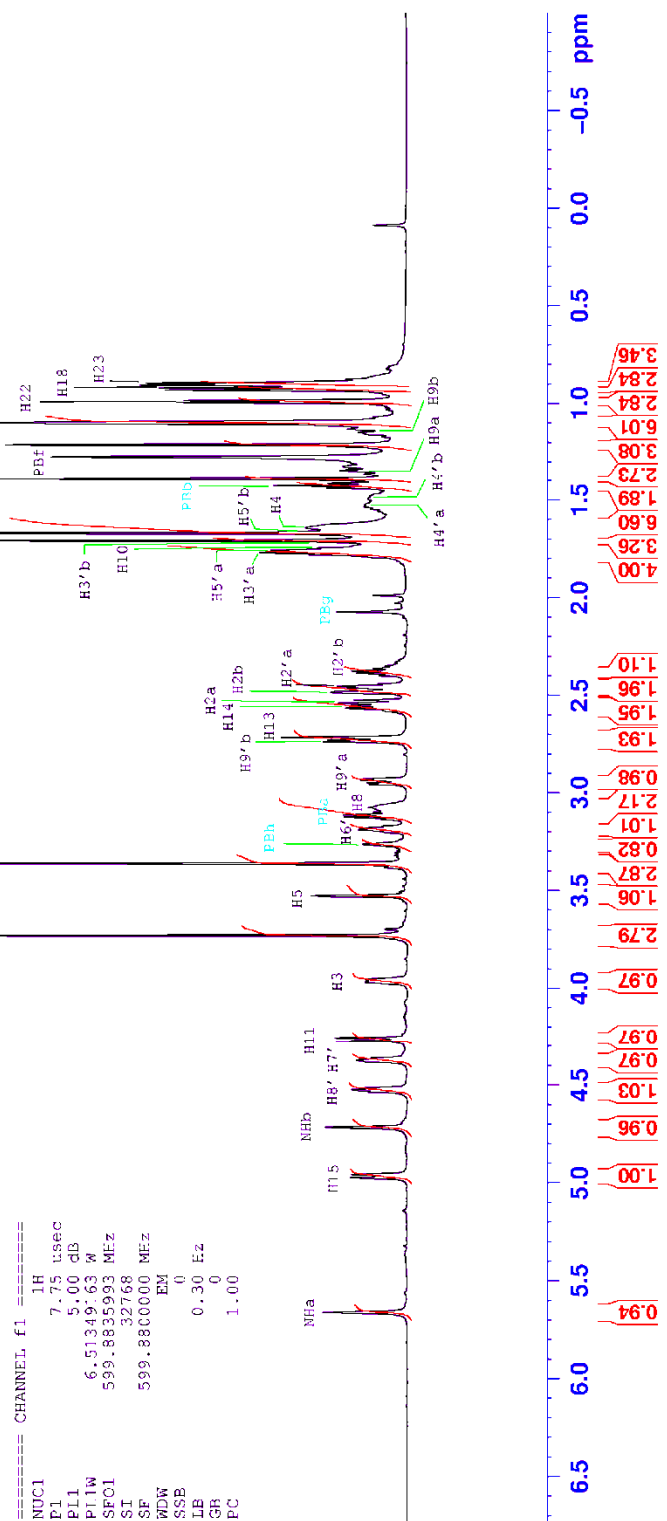

<sup>1</sup>H-NMR spectrum (600 MHz, CDCl<sub>3</sub>) of (C-11)-biotin ester 4a

# 1D spectrum of C-3 sample

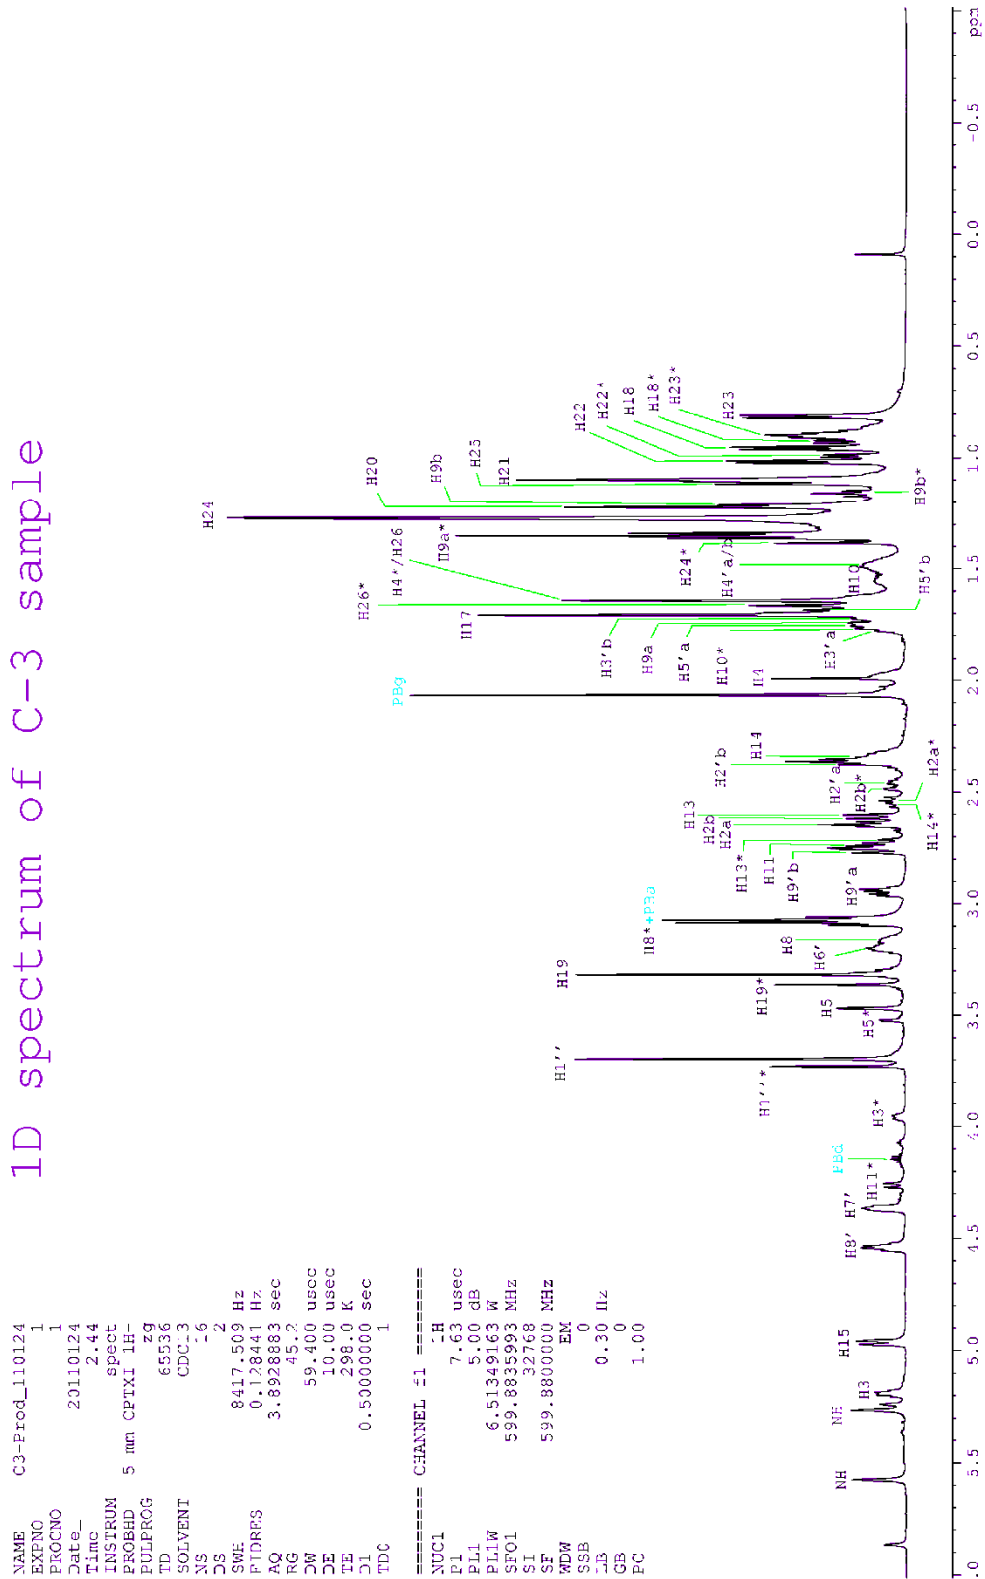

**<sup>1</sup>H-NMR spectrum (600 MHz, CDCl<sub>3</sub>) of (C-3)-biotin ester 4b**
