# Supplementary material for: Investigations on the mode of action of gephyronic acid, an inhibitor of eukaryotic protein translation from myxobacteria
Source: PLOS journal article supplement (doi:10.1371/journal.pone.0201605), 2018-07-31
Supplement: S3 (10.1371/journal.pone.0201605.s003) [file journal.pone.0201605.s003.pdf]

## S3 File. Biological activity of biotinylated gephyronic acid methyl ester

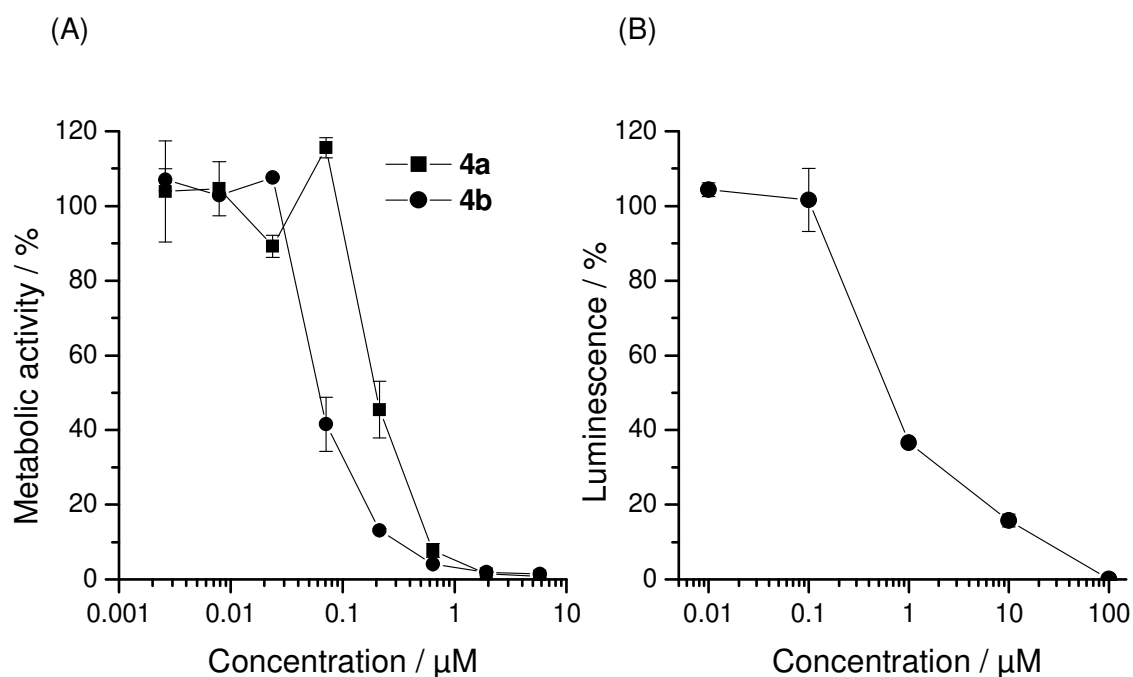

**Figure: Growth and translation inhibition of biotinylated gephyronic acid methyl esters.**

(A) Measuring the concentration dependent metabolic activity of KB-3-1 cell cultures that were incubated with **4a** and **4b** by an MTT assay showed that the compounds still had a high inhibiting capacity. **4b** was the more active one. It was almost as cytotoxic to KB-3-1 cells as the parent compound **1**. The  $IC_{50}$  was  $0.06 \mu\text{M}$ . Assays were run in duplicates. Error bars show S.D. (B) **4b** also inhibited *in vitro* translation ( $IC_{50}$   $6 \mu\text{M}$ ) in a rabbit reticulocyte lysate system supplemented with mRNA and amino acids. Experiment was run in triplicates. Error bars show S.D.
