# Supplementary material for: Investigations on the mode of action of gephyronic acid, an inhibitor of eukaryotic protein translation from myxobacteria
Source: PLOS journal article supplement (doi:10.1371/journal.pone.0201605), 2018-07-31
Supplement: S6 (10.1371/journal.pone.0201605.s006) [file journal.pone.0201605.s006.pdf]

## S6 File. Binding assays with heterologous eIF2 $\alpha$ protein

### Cloning of eIF2 $\alpha$

An eIF2 $\alpha$  cDNA clone of the Mammalian Gene Collection (MGC) (GenBank BC002513) was obtained from BioCat GmbH (Heidelberg, Germany). The coding sequences of the full length protein (aa 1-303) and of the N-terminal domain (aa 1-183) were cloned between the BamHI and AvrII restriction sites of the vector pOpIE2-eGFP [1] with a C-terminal tag using the QuickFusion kit (Absource Diagnostics GmbH, Munich, Germany). The tag consists of a PreScission protease cleavage site, MBP and a 10xHis tag. The full-length and N-terminal eIF2 $\alpha$  sequences were PCR amplified with the primer pairs eIF2a-F/eIF2a-R and eIF2a-F/eIF2a183-R (S2 Table) using the Phusion Flash High Fidelity PCR Master Mix (Thermo Fisher Scientific, Braunschweig, Germany). The tag coding sequence was amplified using primers 3CMBP-F and MBPHis-R (Tab S2) from pOPINM (GenBank EF372396). The eIF2 $\alpha$  PCR product, the PCR product for the tag and the linearized vector were assembled by QuickFusion, followed by transformation of OmniMAX 2-T1 *E.coli* cells (Thermo Fisher Scientific).

### eIF2 $\alpha$ protein production

Full length eIF2 $\alpha$  and the N-terminal domain were produced by transient transfection of High Five insect cells with the pOpIE2 plasmids, followed by purification of two steps of affinity chromatography. 60 ml High Five insect cells from *Trichoplusia ni* were transfected using linear 25 K polyethylenimine (PEI) as described [2], resulting in about 1 ml cell pellet. The cells were resuspended in lysis buffer (50 mM NaHPO<sub>4</sub>, 0.3 M NaCl, 5 mM Imidazol, 0.5% (v/v) IGEPAL CA-630) and lysed with a Dounce homogenizer. Following centrifugation for 1 h at 50,000 rpm in a Beckman Ti-70 rotor and filtration through a 0.45  $\mu$ m filter, the protein was purified by nickel chromatography with a 5 ml HisTrap column (GE Healthcare) using a wash buffer with 50 mM NaHPO<sub>4</sub> and 0.3 M NaCl (pH 8.0). For elution, 500 mM imidazol (pH 8.0) in wash buffer was used. The eluate was further purified on a MBPTrap column (GE Healthcare) using wash buffer with 20 mM HEPES and 100 mM NaCl (pH 7.4) and by elution with wash buffer containing 10 mM maltose.

### Table. Primers for PCR amplification of eIF2 $\alpha$ sequences

|            |                                                                                                 |
|------------|-------------------------------------------------------------------------------------------------|
| eIF2a-F    | CATTTTATTTACAATCAAAGGAGATATACCATGCCGGGTCTAAGTTGTAGATTTTATCAAC                                   |
| eIF2a-R    | TTGCTACCCTGAAACAGAACTCCAGATCTCCATCCACTTCGGCATTTC                                                |
| eIF2a183-R | TTGCTACCCTGAAACAGAACTCCAGGCGCCTATTAATATTATTAATGAGTACTTCCCG                                      |
| 3CMBP-F    | CTGGAAGTTCTGTTTCAGGGTAGCAAAGTGGTAATCTGGATTAACGGCG<br>GGTGATGTTTAAACTGGTCTAGAAAGCTTTTCAGTGATGGTG |
| MBPHis-R   | GTGATGGTGGTGATGGTGGTGAGTCTGCGCGTCTTTCAGGGC                                                      |

### Pull-down assays

Streptavidin magnetic particles (Promega) were used in a pull-down assay for the analysis of the binding of the heterologously expressed eIF2 $\alpha$  protein to GA. 2 nMol Biotinylated GA methylester **4b** (bGS) was incubated for 30 min at room temperature with 100  $\mu$ g washed beads (volume 100  $\mu$ l). Subsequently the beads were washed with PBS using a magnetic stand according to the manufacturer's protocol (Promega). The charged beads were further incubated in 100  $\mu$ l of 0.2 nMol eIF2 $\alpha$  protein for another 30 min at room temperature, either

purified eIF2 $\alpha$  (1-183) or eIF2 $\alpha$  (1-302) fused to the MBP-His8 tag carrying a 3C-protease cleavage site, named R-C04 (63 kD) and R-C03 (77 kD), respectively. After removal of the unbound proteins, the beads were washed once with PBS. After this wash, proteins bound to the beads were analysed after boiling in 30  $\mu$ l Laemmli Loading Buffer at 96°C for 5 minutes and separation on „Any kD“ SDS PAGE gels (Biorad). Gels were stained using „Instant Blue“ (Expedeon). Biotinylated protein A (bPA; Sigma) was used as a positive control for binding to the streptavidin magnetic beads. A binding curve with a range of 1, 2.5, 5; and 10  $\mu$ g of protein A conjugate was made to determine the optimal condition for the binding assay. (Data not shown).

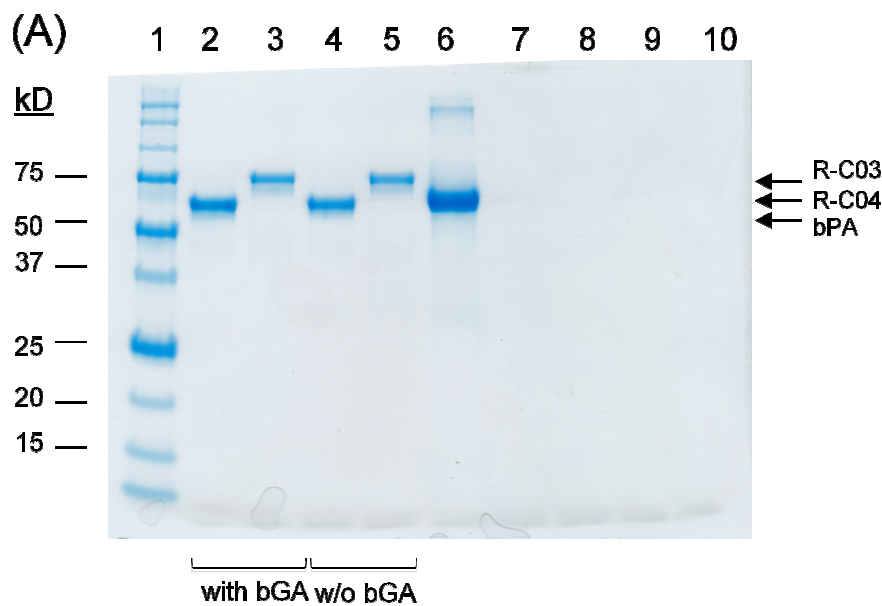

| Lane | Sample                                      | Amount     |
|------|---------------------------------------------|------------|
| 1    | Precision Plus unstained (Biorad)           | 10 $\mu$ l |
| 2    | A1 supernatant R-C03 (0.2 nM ) + bGA (2 nM) | 15 $\mu$ l |
| 3    | B1 supernatant R-C04 (0.2 nM ) + bGA (2 nM) | 15 $\mu$ l |
| 4    | C1 supernatant R-C03 (0.2 nM ) w/o bGA      | 15 $\mu$ l |
| 5    | C3 supernatant R-C04 (0.2 nM ) w/o bGA      | 15 $\mu$ l |
| 6    | D supernatant bPA (positive control)        | 15 $\mu$ l |
| 7    | A1 wash R-C03 (0.2 nM ) + bGA (2 nM)        | 15 $\mu$ l |
| 8    | B1 wash R-C04 (0.2 nM ) + bGA (2 nM)        | 15 $\mu$ l |
| 9    | C1 wash R-C03 (0.2 nM) w/o bGA              | 15 $\mu$ l |
| 10   | C3 wash R-C04 (0.2 nM) w/o bGA              | 15 $\mu$ l |

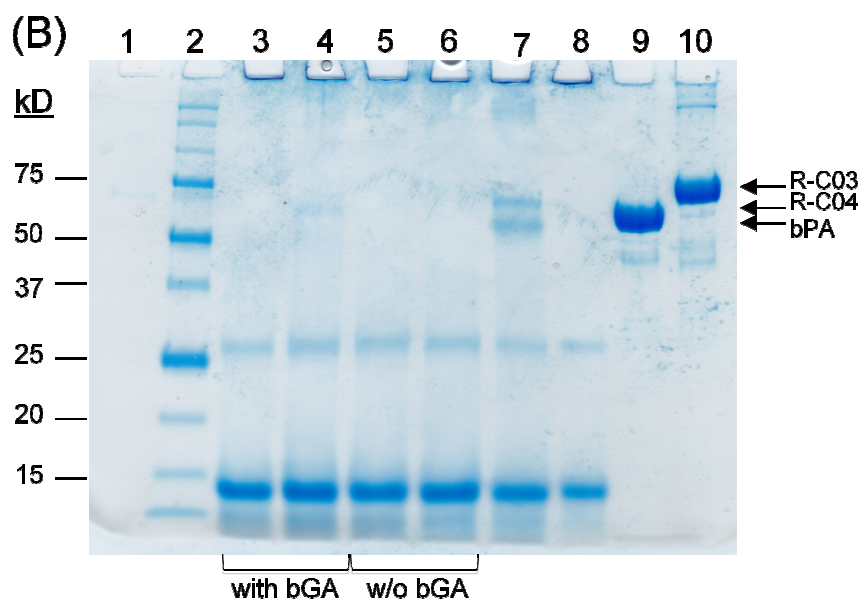

| Lane | Sample                                   | Amount     |
|------|------------------------------------------|------------|
| 1    | D wash bPA (positive control)            | 15 $\mu$ l |
| 2    | Precision Plus unstained (Biorad)        | 10 $\mu$ l |
| 3    | A1 beads R-C03 (0.2 nM) + bGA (2 nM)     | 15 $\mu$ l |
| 4    | B1 beads R-C04 (0.2 nM) + bGA (2 nM)     | 15 $\mu$ l |
| 5    | C1 beads R-C03 (0.2 nM) w/o bGA          | 15 $\mu$ l |
| 6    | C3 beads R-C04 (0.2 nM) w/o bGA          | 15 $\mu$ l |
| 7    | D beads bPA (positive control)           | 15 $\mu$ l |
| 8    | Positive control beads only              | 15 $\mu$ l |
| 9    | eIF2 $\alpha$ _1-183_3C_MBP_His8 (R-C03) | 5 $\mu$ g  |
| 10   | eIF2 $\alpha$ _1-303_3C_MBP_His8 (R-C04) | 5 $\mu$ g  |

**Figure. Pull-down assays with heterologously expressed eIF2 $\alpha$  protein.** (A) Lane 2 – 5 show the unbound fractions of eIF2 $\alpha$  (R-C04 and R-C03) in the presence (lane 2 - 3) or in the absence of biotinylated GA methylester **4b** (bGA; lane 4 - 5). The non-bound BSA carrier protein of the biotinylated protein A (bPA) conjugate is shown in lane 6 but is not visible due to the high concentration of the BSA carrier protein, which masks the bPA. Lane 7-10 represent the wash fraction of the beads from the respective samples lanes 2 - 5. (B) Lane 3 - 6 show the bound protein to the magnetic streptavidin beads. The bound 50 kDa protein A (bPA) was visible in lane 7 (lower band) as well as some of the BSA carrier protein (upper band). Lane 9 and 10 show the quality of the purified protein eIF2 $\alpha$  (R-C04 and R-C03).

For the binding competition experiments the purified human subunit of eIF2 was used, which was isolated using two steps of affinity chromatography. The human eIF2 $\alpha$  purified by metal chelate binding to the His-tag and MBP binding showed highly purified fractions of this protein. There is no sequence information about the *Trichoplusia ni* eIF2 complex neither could we detect co-purification of the complex. Furthermore, there is nothing known whether the truncated human eIF2 $\alpha$  or the full length protein is able to assemble into the insect eIF2 complex. Therefore we decided to evaluate the binding of GA-biotinylated first to the purified protein. The result of this experiment was that there is no binding detectable.

## References:

1. Bleckmann M, Fritz MH, Bhujra S, Jarek M, Schurig M, Geffers R, Benes V, Besir H, van den Heuvel J. (2015). Genomic Analysis and Isolation of RNA Polymerase II Dependent Promoters from *Spodoptera frugiperda*. PLoS One 10, e0132898.
2. Karste K, Bleckmann M, van den Heuvel J. (2017). Not Limited to E. coli: Versatile Expression Vectors for Mammalian Protein Expression. Methods Mol Biol 1586, 313-324.
